# Supplementary material
Source: publisher figshare collection journal article supplement (https://acs.figshare.com/ndownloader/files/4688785)
Supplement: Supplementary file 1 [file 4688785]

# Detailed analysis of electron transfer properties of azurin adsorbed on graphite electrodes using dc and large amplitude Fourier transformed ac voltammetry

*Barry D. Fleming<sup>†</sup>, Jie Zhang<sup>¤</sup>, Darrell Elton<sup>‡</sup> and Alan M. Bond<sup>†\*</sup>*

<sup>†</sup> School of Chemistry, Monash University, Victoria 3800, Australia, <sup>¤</sup> Level 8, Institute of Bioengineering and Nanotechnology, 31 Biopolis Way, The Nanos, #04-01, Singapore 138669, and <sup>‡</sup> Department of Electronic Engineering, La Trobe University, Bundoora, Victoria 3086, Australia.

**Supporting Information:** Experimental 2<sup>nd</sup> and 3<sup>rd</sup> harmonic voltammograms, a table of  $E^{0'}$  values derived from harmonic data, experimental and simulated FT dc data, and simulated and experimental power spectra are included here.

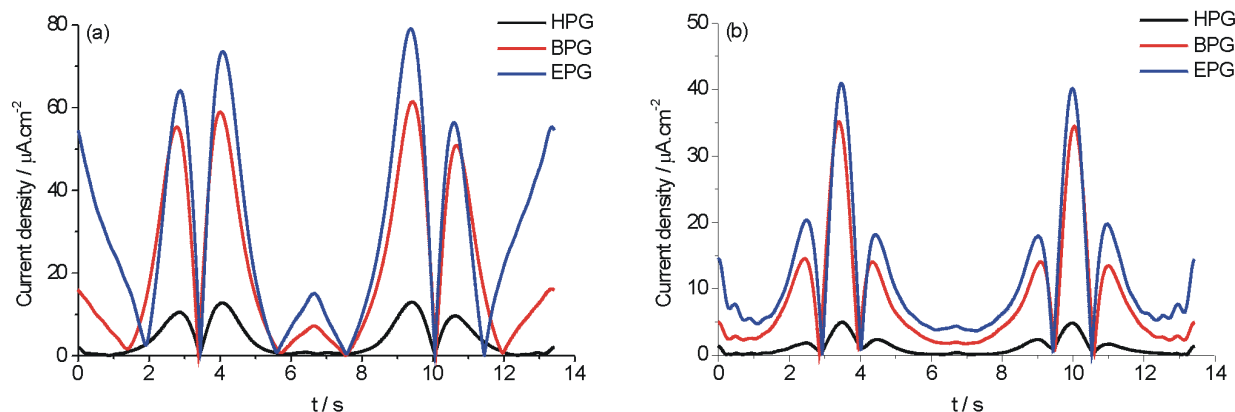

Figure S-1 – The (a) 2<sup>nd</sup> and (b) 3<sup>rd</sup> harmonic voltammograms for azurin adsorbed onto HPG (black), BPG (red) and EPG (blue) electrodes. Experimental conditions:  $f = 22$  Hz,  $\Delta E = 80$  mV,  $v = 0.09686$  V.s<sup>-1</sup>,  $E_i = 0.450$  V,  $E_s = -0.200$  V.

Table S-1 -  $E^{0'}$  values (V vs. SHE) calculated<sup>a</sup> from the 1<sup>st</sup>, 2<sup>nd</sup>, 3<sup>rd</sup> and 4<sup>th</sup> harmonic voltammograms for azurin-modified HPG, BPG & EPG electrodes.

|          | HPG             |                 |                 |                 | BPG             |                 |                 |                 | EPG             |                 |                 |                 |
|----------|-----------------|-----------------|-----------------|-----------------|-----------------|-----------------|-----------------|-----------------|-----------------|-----------------|-----------------|-----------------|
| $f$ / Hz | 1 <sup>st</sup> | 2 <sup>nd</sup> | 3 <sup>rd</sup> | 4 <sup>th</sup> | 1 <sup>st</sup> | 2 <sup>nd</sup> | 3 <sup>rd</sup> | 4 <sup>th</sup> | 1 <sup>st</sup> | 2 <sup>nd</sup> | 3 <sup>rd</sup> | 4 <sup>th</sup> |
| 10       | 0.325           | 0.322           | 0.317           | 0.316           | 0.328           | 0.327           | 0.324           | 0.324           | 0.325           | 0.323           | 0.319           | 0.318           |
| 22       | 0.326           | 0.324           | 0.317           | 0.316           | 0.329           | 0.327           | 0.324           | 0.324           | 0.325           | 0.323           | 0.318           | 0.318           |
| 36       | -               | -               | -               | -               | 0.328           | 0.327           | 0.324           | 0.324           | 0.324           | 0.323           | 0.318           | 0.318           |
| 61       | -               | -               | -               | -               | 0.328           | 0.327           | 0.323           | 0.324           | 0.324           | 0.323           | 0.318           | 0.317           |
| 84       | -               | -               | -               | -               | 0.328           | 0.326           | 0.323           | 0.324           | 0.324           | 0.322           | 0.317           | 0.317           |
| 107      | -               | -               | -               | -               | 0.328           | 0.327           | 0.324           | 0.324           | 0.324           | 0.322           | 0.317           | 0.317           |
| 135      | -               | -               | -               | -               | 0.328           | 0.327           | 0.324           | 0.324           | 0.323           | 0.322           | 0.317           | 0.317           |

<sup>a</sup> As for the dc case, the  $E^{0'}$  values were calculated using  $(E_p^{ox} + E_p^{red})/2$ , however  $E_p^{ox}$  and  $E_p^{red}$  were measured at the positions of the highest peaks for the 1<sup>st</sup> and 3<sup>rd</sup> harmonics, and the position of the minimum between the two largest peaks for the 2<sup>nd</sup> and 4<sup>th</sup> harmonics.

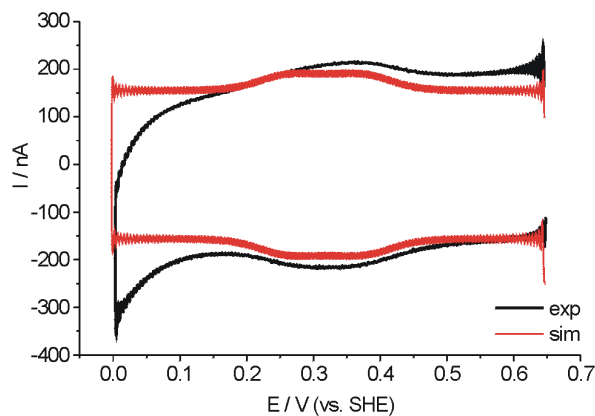

Figure S-2 – Comparison of experimental (black line) and simulated (red line) dc cyclic voltammograms obtained from an ac sine wave experiment for azurin adsorbed onto a BPG electrode. Experimental conditions as per Figure 8, except:  $f = 22$  Hz. Simulation parameters:  $C_{dl} = 46 \mu\text{F.cm}^{-2}$ ,  $\Gamma_{dc} = 24 \text{ pmoles.cm}^{-2}$ ,  $E^{0'} = 0.318 \text{ V}$ ,  $R_u = 170 \Omega$ ;  $k^{0'} = 1000 \text{ s}^{-1}$ ,  $\alpha = 0.5$ .

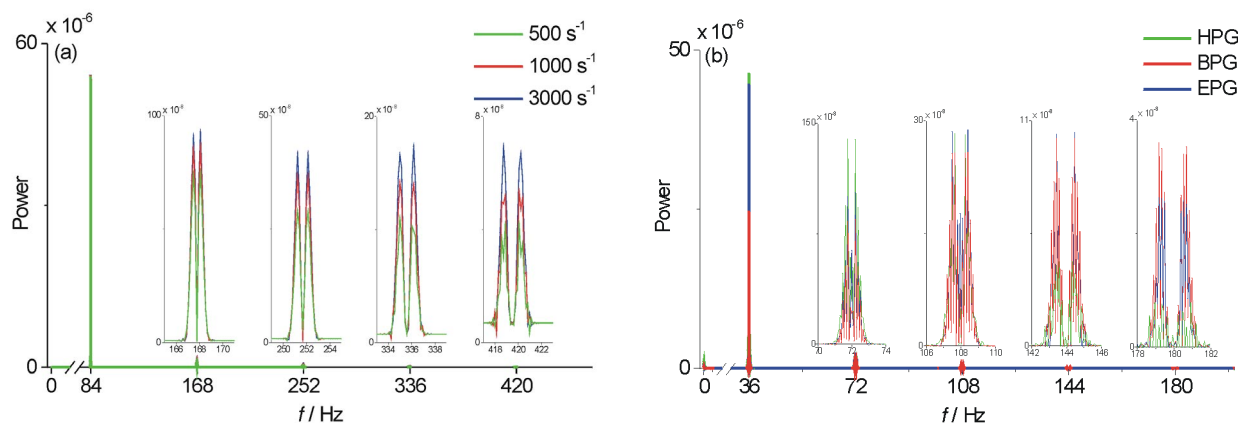

Figure S-3 – Power spectra obtained from (a) simulated total current sine-wave voltammograms having  $k^{0'}$  values of 500 (green), 1000 (red) and  $3000 \text{ s}^{-1}$  (blue), and (b) experimental total current sine-wave voltammograms of azurin adsorbed onto HPG (green), BPG (red) and EPG (blue) electrodes. Simulation parameters:  $C_{dl} = 36 \mu\text{F.cm}^{-2}$ ,  $\Gamma = 11 \text{ pmoles.cm}^{-2}$ ,  $E^{0'} = 0.318 \text{ V}$ ,  $R_u = 170 \Omega$ ,  $\alpha = 0.5$ . Experimental conditions as per Figure 8.
